# 1 Multi-omics integration of the phenome, 2 transcriptome and genome highlights genes 3 and pathways relevant to essential tremor

4  
5 Calwing Liao<sup>1,2</sup>, Faezeh Sarayloo<sup>1,2</sup>, Daniel Rochefort<sup>2</sup>, Gabrielle Houle<sup>1,2</sup>, Fulya Akçimen<sup>1,2</sup>,  
6 Qin He<sup>3</sup>, Alexandre D. Laporte<sup>2</sup>, Dan Spiegelman<sup>2</sup>, Alex Rajput<sup>4</sup>, Patrick A. Dion<sup>2,5</sup>, Guy A.  
7 Rouleau<sup>1,2,5</sup>

8  
9 <sup>1</sup>Department of Human Genetics, McGill University, Montréal, Quebec, Canada

10 <sup>2</sup>Montreal Neurological Institute, McGill University, Montréal, Quebec, Canada.

11 <sup>3</sup>Department of Biomedical Sciences, Université de Montréal, Montréal, Quebec, Canada

12 <sup>4</sup>Saskatchewan Movement Disorders Program, University of Saskatchewan, Saskatoon Health  
13 Region, Saskatoon, Canada

14 <sup>5</sup>Department of Neurology and Neurosurgery, McGill University, Montréal, Quebec, Canada

15  
16 Word count: 3990

17 Figures: 4

18 Tables: 3

19 Keywords: pheWAS, transcriptome, essential tremor, *CACNA1A*, *SHF*, *PRKG1*

20  
21  
22  
23  
24  
25  
26  
27

28

29

## 30 Abstract

31 The genetic factors predisposing to essential tremor (ET), of one of the most common movement  
32 disorders, remains largely unknown. While current studies have examined the contribution of  
33 both common and rare genetic variants, very few have investigated the ET transcriptome. To  
34 understand pathways and genes relevant to ET, we used an RNA sequencing approach to  
35 interrogate the transcriptome of two cerebellar regions, the dentate nucleus and cerebellar cortex,  
36 in 16 cases and 16 age- and sex-matched controls. Additionally, a phenome-wide association  
37 study (pheWAS) of the dysregulated genes was conducted, and a genome-wide gene association  
38 study (GWGAS) was done to identify pathways overlapping with the transcriptomic data. We  
39 identified several novel dysregulated genes including *CACNA1A*, a calcium voltage-gated  
40 channel implicated in ataxia. Furthermore, several pathways including axon guidance, olfactory  
41 loss, and calcium channel activity were significantly enriched. A subsequent examination of the  
42 ET GWGAS data (N=7,154) also flagged genes involved in calcium ion-regulated exocytosis of  
43 neurotransmitters to be significantly enriched. Interestingly, the pheWAS identified that the  
44 dysregulated gene, *SHF*, is associated with a blood pressure medication (P=9.3E-08), which is  
45 commonly used to reduce tremor in ET patients. Lastly, it is also notable that the dentate nucleus  
46 and cerebellar cortex have different transcriptomes, suggesting that different regions of the  
47 cerebellum have spatially different transcriptomes.

## 48 Introduction

49 Essential tremor (ET), one of the most common movement disorders, involves rhythmic shaking  
50 during voluntary movements, particularly in the hands<sup>1</sup>. Although the disease is not fatal, it can  
51 have large negative effects on daily life and psychological well-being. Familial clustering  
52 suggests that genetic factors have an important role in ET. Twin studies have shown that ET has a  
53 concordance of 69–93% in monozygotic twins and 27–29% in dizygotic twins, suggesting that  
54 both genetics and environmental factors drive the phenotype<sup>2</sup>. Despite dozens of studies  
55 investigating the genetic etiology of ET, the heritability has largely remained unexplained. This  
56 is likely due to the misdiagnosis of ET as other similar movement disorders (e.g. Parkinson's  
57 disease and dystonia), phenocopies, genetic heterogeneity and incomplete penetrance of risk  
58 alleles, greatly reducing statistical power of linkage studies<sup>3,4</sup>.

59 By comparison to other neurological conditions, there have been relatively few genetic studies of  
60 ET. These studies have used approaches that range from screening of function-based candidate  
61 genes, linkage and gene associations, and high-throughput sequencing of familial cases. In 2016,  
62 the largest genome-wide association study (GWAS) thus far reported used ET cases of European  
63 descent and identified three genomic loci associated with ET<sup>5</sup>. Since this last study, replications  
64 were undertaken across cohorts of ET cases of different ethnic origin (e.g. Han-Chinese), yet  
65 only a few successfully replicated the association of a single locus. The failure to replicate more  
66 than a locus is possibly due to relatively small cohorts and haplotype structures that were too  
67 different from the one originally used in 2016. A form of study that is absent from the ET  
68 literature is a high-throughput transcriptomic-wide approach to identify gene dysregulations  
69 across the expression profile of disease relevant brain tissue. The cerebellum has been previously  
70 implicated in ET through histological studies. Specifically, atrophy and dysregulation of Purkinje  
71 cells have largely been associated with ET<sup>6</sup>. Since little is known about the underlying biology of  
72 ET and genomic studies have not found adequate evidence for the suggested heritability of ET,  
73 we conducted RNA sequencing to identify dysregulated genes and pathways. We sequenced two  
74 distinct regions of the cerebellum: the cerebellar cortex and the dentate nucleus, in 16 cases and  
75 16 age- and sex-matched controls. Additionally, we conducted a genome-wide gene association  
76 study (GWGAS) using ET GWAS data to narrow down relevant pathways. Several interesting  
77 genes such as *PRKGI* and *CACNA1A* were differentially expressed. A phenome-wide association

78 study (pheWAS) of the differentially expressed genes (DEGs) identified blood pressure  
79 medication as a relevant phenotype for the DEG, *SHF*. Both RNA sequencing and GWAS  
80 identified calcium-channel relevant pathways suggesting that dysregulation in these pathways  
81 contribute towards the ET phenotype.

82

## 83 Results

### 84 Differentially expressed genes identify potentially disease relevant pathways

85 Six genes were differentially expressed in the cerebellar cortex and two genes were differentially  
86 expressed for the dentate nucleus for an FDR of 0.05 (Table 1). The QQ-plot did not show any  
87 large stratification of the data in cerebellar cortex or dentate nucleus (Supplementary Figure 1,  
88 2). Interestingly, the top dentate nucleus differentially expressed genes differed compared to the  
89 cerebellar cortex. The top non-coding RNA differentially expressed was *LINC00599* in the  
90 cerebellar cortex, which was highly associated with calcium ion-regulated exocytosis of  
91 neurotransmitter ( $P = 3.3E-06$ ), ionotropic glutamate receptor signaling pathway ( $P = 9.2E-10$ ),  
92 neurotransmitter secretion ( $P = 1.6E-09$ ) and synaptic vesicle exocytosis ( $P=1.0E-07$ ) in the GO  
93 database based on GeneNetwork's co-expression database. Pathway analyses of the DEGs based  
94 on co-expression identified six clusters for the differentially expressed genes (Figure 1). Several  
95 novel pathways possibly implicated in ET were identified including axon guidance, olfactory  
96 receptor activity, and voltage-gated calcium channel activity for the cerebellar cortex (Table 2).  
97 Two gene clusters were identified for the dentate nucleus (Figure 2). Many pathways were  
98 enriched in the dentate nucleus, including olfactory transduction, olfactory signaling pathway  
99 and MAPK signaling (Table 3). Splicing analysis with rMATs and SUPPA2 did not find any  
100 significant retained introns, mutually exclusive exons, alternative 3' splice sites, alternative 5'  
101 splice sites or skipped exons between cases and controls. Reverse transcriptase qPCR (RT-qPCR)  
102 of the DEGs supported the direction as the Wald test statistic (Supplementary Table 1).

103

### 104 Expression levels across different tissue types and brain developmental stages

105 Expression levels in GTEx53 show that most of the DEGs are highly expressed in the brain  
106 cerebellar hemisphere and brain cerebellum (Supplementary Figure 3). Additionally, different  
107 regions of the brain have different expression levels for these genes. Expression levels across 29

108 different ages of brain samples from BrainSpan show that most of the DEGs are stably expressed  
109 during development (Supplementary Figure 4).

110

111 Genome-wide gene association study of previous ET GWAS data identifies calcium-  
112 relevant pathways

113 To narrow down relevant pathways, a genome-wide gene association study (GWGAS) was done.  
114 The input SNPs were mapped to 18,220 protein coding genes. The genome-wide gene  
115 association study (GWGAS) identified *BUB1* reaching Bonferroni genome-wide significance  
116 and several genes reaching suggestive significance (Figure 3A). Clustering of the genes based on  
117 co-expression identified four distinct clusters (Supplementary Figure 5). From the pathway  
118 analyses, calcium ion-regulated exocytosis of neurotransmitters in GO was significantly enriched  
119 in the pathway in cluster three ( $P=9.7E-03$ ). Gene-level enrichment analyses in GTEx 30 v7  
120 found the brain to be significantly associated ( $P=0.001$ ). After, the enrichment was queried in the  
121 brain-relevant regions of GTEx 53 v7 we found the cerebellar cortex and frontal cortex to pass  
122 Bonferroni-corrected significance (Figure 3B). No ET GWAS SNPs were found to be eQTLs for  
123 the dysregulated genes based on the GTEx53 database (Supplementary Figure 6-12).

124

125 Phenome-wide association of DEGs

126 The phenome-wide association study (pheWAS) showed that *SHF* was significantly associated  
127 with blood pressure medication ( $P=9.30E-08$ ) and body mass index (BMI) ( $P=1.5E-07$ ) (Figure  
128 4). No other DEGs had associations that passed a Bonferroni-corrected p-value.

129

## 130 Discussion

131 Interestingly, calcium pathways and relevant genes were significant for differential expression  
132 and pathway analyses. In a paper by Topaktas *et al.* (1987), the use of calcium blockers led to  
133 intensified tremors in ET patients<sup>7</sup>. Interestingly, the calcium channel gene, *CACNA1A*, had  
134 lower levels of expression in ET patients, suggesting that cellular calcium may be relevant to the  
135 ET phenotype. In mice, knockout *CACNA1A* lines shown a tremor phenotype according to The  
136 Jackson Laboratory mice database. Furthermore, *CACNA1A* has been shown to be highly  
137 expressed in Purkinje cells, a relevant ET cell type<sup>8</sup>. The translated protein of *PRKG1*, PKG, has

138 been reported to increase opening of calcium-activated potassium channels, further indicative of  
139 the relevance of calcium in ET<sup>9</sup>. Furthermore, irregular GABA-A receptor function has been  
140 previously shown to be affected by *CACNA1A*<sup>10</sup>. It is hypothesized that defective GABA  
141 receptors contribute towards the ET phenotype by disinhibition of cerebellar pacemaker output<sup>11</sup>.  
142 Additionally, the gene has been shown to be highly co-expressed with *GABRA4* based on the  
143 Gene Network database (P=1.6E-13), reinforcing *CACNA1A* as a gene of interest for ET.

144  
145 The top DEG, *PRKGI*, has been shown to regulate cardiovascular and neuronal health<sup>9</sup>.  
146 Specifically, the RNA isoform two (*PRKG1B*) was most significantly differentially expressed at  
147 the transcript level. Currently, there has yet to be any study to link *PRKGI* and ET. However, the  
148 gene is highly expressed in Purkinje cells, which is a relevant cerebellar cell type in ET<sup>12</sup>. Also,  
149 the ET brain staining did not show significant Purkinje cell loss, suggesting transcriptomic  
150 dysregulation of Purkinje cells may be more relevant to ET than degeneration. Interestingly,  
151 *PRKGI* has been associated with alcohol misuse and many ET patients report reduced tremor  
152 intensity with alcohol, however, the pheWAS data did not show any associations<sup>13</sup>.

153  
154 Pathway analyses additionally found several potentially relevant pathways such as axon  
155 guidance and neuromuscular junction. Interestingly, a possibly deleterious variant in *TENM4*, a  
156 regulator of axon guidance, was shown to segregate in ET families and cause tremor in knockout  
157 mice, reinforcing the relevance of this pathway in ET<sup>14</sup>.

158  
159 The GWAS identified *BUB1* as a significantly enriched gene for ET. *BUB1* is transcribed and  
160 translated into a serine/threonine kinase, similar to *STK32B*, which was a significant ET locus  
161 previously identified<sup>15</sup>. Amongst the significantly enriched pathways in the GWAS and DEGs,  
162 calcium ion-regulated exocytosis of neurotransmitter was found to be in common between the  
163 two. This suggests that dysregulation in calcium homeostasis may affect relevant  
164 neurotransmitter exocytosis in ET patients.

165  
166 The relationship of *SHF* with blood pressure medication from the pheWAS may suggest that  
167 beta-blockers interact with *SHF*. Beta-blockers such as propranolol can reduce kinetic tremor in  
168 certain ET patients<sup>16</sup>. The gene was clustered with the calcium-related genes such as *CACNA1A*,

169 suggesting that beta-blockers may influence pathways identified from that cluster such as  
170 calcium channel activity. Furthermore, with the associated BMI trait, it could suggest that it is a  
171 potential risk factor for ET. Future studies should investigate the relationship between this gene  
172 and those phenotypes and determine whether *SHF* may be a biomarker for beta-blocker  
173 responsive ET patients.

174

175 Interestingly, examination of the dentate nucleus and cerebellar cortex from the same individuals  
176 revealed them to have distinct transcriptome profiles—the top DEGs were different between the  
177 two tissues. Based on the GTEx53 expression profiles of different tissue types, the differential  
178 expression across tissues reinforces the notion that the dentate nucleus and cerebellar cortex  
179 would have different DEGs. The BrainSpan database showed that the DEGs are similarly  
180 expressed across different ages and that adulthood has moderate to high expression of the DEGs.

181

182 Olfactory transduction and signaling were pathways enriched in both the dentate nucleus and  
183 cerebellar cortex. Past studies have had conflicting views on whether olfactory loss is an  
184 endophenotype for ET. However, the transcriptomic data objectively supports that a subset of ET  
185 patients likely have dysregulated olfactory phenotypes. Furthermore, in *MAPK* pathways were  
186 enriched in the dentate nucleus. This is interesting because beta-blockers have been shown to  
187 have downstream effects on MAPK-relevant pathways.

188

189 Here, we report the first transcriptomic study of ET and identified several dysregulated genes and  
190 relevant pathways. However, we acknowledge that bulk RNA sequencing cannot thoroughly  
191 distinguish which cell types may be driving the differentially expressed signals. Further  
192 replication studies investigating the transcriptome should be done for ET as the disease is highly  
193 heterogeneous. Future studies could investigate the spatial transcriptomics or single-cell  
194 sequencing of ET relevant tissue and integrate large datasets to further refine relevant genes and  
195 pathways.

196

## 197 Methods

### 198 Sample selection and criterion

199 Patients attending MDCS (Movement Disorder Clinic Saskatchewan) are offered autopsy at no  
200 cost to the family/estate. Autopsy consent is granted by the next-of-kin after death of the patient.  
201 The body is transported to Saskatoon and autopsy is performed within 24 h of death. The autopsy  
202 consent is approved by the Saskatoon Health Region Authority and the use of brain for research  
203 is approved by the Bioethics Board of the University of Saskatchewan. Further details on patient  
204 recruitment can be found from Rajput et al. (2015) and Rajput et al. (2016)<sup>17,18</sup>.

205  
206 ET brains (N=16) were dissected to obtain the dentate nucleus and cerebellar cortex. Samples  
207 were selected based on the following criteria: grossly unremarkable cerebellum, staining showed  
208 no noticeable degeneration, no other neurological disorders or movement disorders (i.e.  
209 Parkinson's disease or dystonia), no signs of dementia or mild/moderate Alzheimer's changes,  
210 and have definite or probable ET. Controls (N=16) were age- and sex- matched. Additionally, the  
211 controls did not have any noticeable neurodegenerative or psychiatric disorders. The pH of all  
212 brains was neutral. Samples were matched to have an average RIN of 5.

213  
214 RNA extraction and sequencing

215 RNA was extracted from 64 samples using the RNeasy Lipid Tissue Mini Kit (Qiagen). Two  
216 samples were removed due to low quality. The RNA concentration was measured on the Synergy  
217 H4 microplate reader. RNA was sent to Macrogen Inc. for sequencing. Library preparation was  
218 done using the TruSeq Stranded Total RNA Kit (Illumina) with Ribo-Zero depletion. Sequencing  
219 was done on the NovaSeq 6000 at 150bp paired-end reads with a total of 200M reads. Samples  
220 were randomized for tissue dissection, RNA extraction, Ribo-Zero depletion, library preparation  
221 and sequencing to account for potential batch effects.

222  
223 Data processing, differential expression, splicing and eQTL analyses

224 The FASTQ files were pseudo-aligned using Salmon using the Ensembl v94 annotation of the  
225 human genome<sup>19</sup>. For data processing and parameters of Salmon, please refer to Liao et al.  
226 (2019)<sup>15</sup>. Sleuth was used to identify DEGs<sup>20</sup>. The data was analyzed with the following full



227 model for the likelihood ratio test: Gene expression ~ disease status + sex + age + sex:disease  
228 status + age:sex + sex:disease status. The reduced model for the likelihood ratio test is: Gene  
229 expression ~ sex + age + sex:age. A Wald test was used to get beta values, which is a bias  
230 estimator. Beta approximates the extent at which estimated counts is affected by the disease  
231 status rather than technical and biological variability. It can be used to estimate the magnitude  
232 and direction of fold change. P-values were corrected using the Benjamini-Hochberg procedure  
233 to account for false discovery rate (FDR). Q-value (p-values corrected for FDR) significance was  
234 set for <0.05. Splicing analyses were done with SUPPA2 and rMATs<sup>21,22</sup>.

235

### 236 Validation with reverse transcriptase qPCR

237 To validate the significant DEGs, reverse transcriptase qPCR (RT-qPCR) was done. Following  
238 the manufacturer's protocol, the SuperScript Velo cDNA Synthesis Kit (ThermoFisher Scientific)  
239 was used to convert 1 µg of RNA into cDNA. A standard curve was made for each TaqMan  
240 probe to determine PCR efficiency. The gene *POLR2A* (polymerase [RNA] II [DNA-directed]  
241 polypeptide) was used as an endogenous control.

242

### 243 Pathway enrichment analyses in brain tissue

244 Gene clustering was done using the GeneNetwork v2.0 RNA sequencing database (N=31,499).  
245 Clusters were independently analyzed for different enriched pathways in databases such as  
246 Reactome and GO. FUMA was used to identify enrichment in BrainSpan and GTEx 53 v7<sup>23</sup>.  
247 Tissue specificity was tested in GTEx 53 v7. Briefly, DEG sets were pre-made and the input  
248 genes were tested against the DEG sets using a hypergeometric test. DEGs with a q-value <0.30  
249 were included for analysis.

250

### 251 Gene-level analyses of ET GWAS data

252 The raw genotyping data from the discovery cohort of the 2016 ET GWAS was obtained  
253 (N=7154). Data quality control included the following: Hardy-Weinberg equilibrium t-test  $P <$   
254  $1E-4$ , minor allele frequency  $MAF > 0.05$ , genotype missingness  $< 2\%$ , and sex discordance.  
255 Imputation was performed using EAGLE2 and PWBT, using the Sanger Imputation Service, and  
256 samples with  $INFO < 0.3$  were removed. The data was analyzed using BOLT-LMM with 15

257 principle components<sup>24</sup>. A genome-wide gene association study (GWGAS) was done using  
258 MAGMA using the European UK Biobank as a reference LD panel. Genome-wide gene  
259 association studies considers the combined association effect of all SNPs in a gene to aggregate  
260 into a combined gene-level P-value. Genes with a suggestive Bonferroni-corrected p-value  
261 ( $P < 0.10$ ) were further queried in downstream analyses. Gene expression analysis was done using  
262 MAGMA for GTEx 53 v7 and BrainSpan. In the 30-general tissue GTEx v7 and then looked at  
263 expression of all brain-relevant regions in GTEx 53 v7. Gene clustering was done using the  
264 GeneNetwork v2.0 RNA sequencing database ( $N=31,499$ )<sup>25</sup>. Pathway enrichment and gene  
265 ontology analyses were also done for GWGAS data. Additionally, all ET-associated GWAS loci  
266 ( $P < 1E-06$ ) were queried in GTEx53 to determine if any were eQTLs for the differentially  
267 expressed genes.

268

## 269 Phenome-wide association of differentially expressed genes

270 To understand which phenotypes may be associated with the differentially expressed genes, a  
271 pheWAS was done using GWASAtlas, which uses public genome-wide association study (GWAS)  
272 data<sup>26</sup>. Bonferroni-corrected of  $1.68E-05$  ( $0.05/\#$  of unique traits) was used. At the time, there  
273 were 2977 traits.

274

275

## 276 Tables and Figures.

277 **Table 1. Differentially expressed genes of the cerebellum in ET patients compared to**  
278 **controls.**

| Gene            | Function            | P-value  | Q-value | Beta      | Tissue            |
|-----------------|---------------------|----------|---------|-----------|-------------------|
| <i>PRKG1</i>    | Kinase              | 1.08E-08 | 0.00068 | -11.89647 |                   |
| <i>SAC3D1</i>   | Mitotic function    | 2.84E-07 | 0.00903 | +26.09570 |                   |
| <i>SHF</i>      | Apoptosis           | 1.22E-06 | 0.02089 | -17.69694 | Cerebellar Cortex |
| <i>TRAPPC11</i> | Protein trafficking | 1.31E-06 | 0.02089 | -16.59086 |                   |
| <i>NELL2</i>    | Neuronal survival   | 2.28E-06 | 0.02896 | -8.60137  |                   |

|                |                 |          |         |           |                 |
|----------------|-----------------|----------|---------|-----------|-----------------|
| <i>CACNA1A</i> | Calcium channel | 8.89E-06 | 0.04421 | -15.30147 |                 |
| <i>PLCG2</i>   | Phospholipase   | 2.39E-07 | 0.04381 | -9.73396  | Dentate Nucleus |
| <i>ALDH3A2</i> | Dehydrogenase   | 1.81E-06 | 0.04491 | -21.87150 |                 |

279

280 **Table 2. Significant pathways of gene clusters identified through gene network analysis for**  
 281 **the cerebellar cortex.**

| Pathway                                                                                                                               | P-value | Database     | Cluster |
|---------------------------------------------------------------------------------------------------------------------------------------|---------|--------------|---------|
| Cardiac conduction                                                                                                                    | 6.4E-04 | GO Processes |         |
| Triglyceride lipase activity                                                                                                          | 6.9E-03 | GO Function  | 1       |
| Olfactory receptor activity                                                                                                           | 2.8E-03 | GO Function  |         |
| Voltage-gated calcium channel complex                                                                                                 | 3.2E-04 | GO Cellular  |         |
| Positive regulation of cytosolic calcium ion concentration involved in phospholipase C-activating G-protein coupled signaling pathway | 6.5E-03 | Go Processes | 2       |
| Neuromuscular junction                                                                                                                | 1.7E-03 | Go Cellular  |         |
| Axon                                                                                                                                  | 4.5E-03 | Go Cellular  |         |
| Presynaptic depolarization and calcium channel opening                                                                                | 2.5E-03 | Reactome     | 3       |
| Transmission across chemical synapses                                                                                                 | 1.5E-03 | Reactome     |         |
| Amyloid-beta binding                                                                                                                  | 5.0E-03 | GO Function  |         |
| GABA-A receptor complex                                                                                                               | 5.7E-04 | GO Cellular  |         |
| Neuron projection                                                                                                                     | 4.9E-04 | GO Cellular  |         |
| Signaling by GPCR                                                                                                                     | 1.6E-04 | Reactome     | 4       |
| Positive regulation of cytosolic calcium ion concentration                                                                            | 4.5E-03 | Go Processes |         |
| Potassium ion leak channel activity                                                                                                   | 5.6E-03 | GO Function  | 5       |
| Vascular smooth muscle contraction                                                                                                    | 1.6E-03 | KEGG         |         |
| Transmission across chemical synapses                                                                                                 | 4.9E-04 | Reactome     | 6       |
| Presynaptic depolarization and calcium channel opening                                                                                | 1.0E-03 | Reactome     |         |
| Axon guidance                                                                                                                         | 3.5E-03 | Reactome     |         |
| Regulation of glutamatergic synaptic transmission                                                                                     | 3.6E-04 | Go Processes |         |
| Cellular calcium ion homeostasis                                                                                                      | 9.5E-03 | GO Processes |         |
| High voltage-gated calcium channel activity                                                                                           | 5.0E-04 | GO Function  |         |
| Hypertrophic cardiomyopathy                                                                                                           | 4.7E-04 | KEGG         |         |

282

283

284 **Table 3. Significant pathways of clusters with DEGs identified through gene network**  
 285 **analysis for dentate nucleus.**

| Pathway                           | P-value | Database     | Cluster |
|-----------------------------------|---------|--------------|---------|
| Nuclear events mediated by MAPK   | 4.6E-06 | Reactome     | 1       |
| Regulation of synaptic plasticity | 6.2E-03 | GO           |         |
| Olfactory transduction            | 7.3E-03 | KEGG         |         |
| Olfactory signaling pathway       | 4.9E-04 | Reactome     | 2       |
| Neuron migration                  | 4.0E-03 | Go Processes |         |
| Protein kinase activity           | 2.8E-03 | GO Function  |         |

286  
 287  
 288

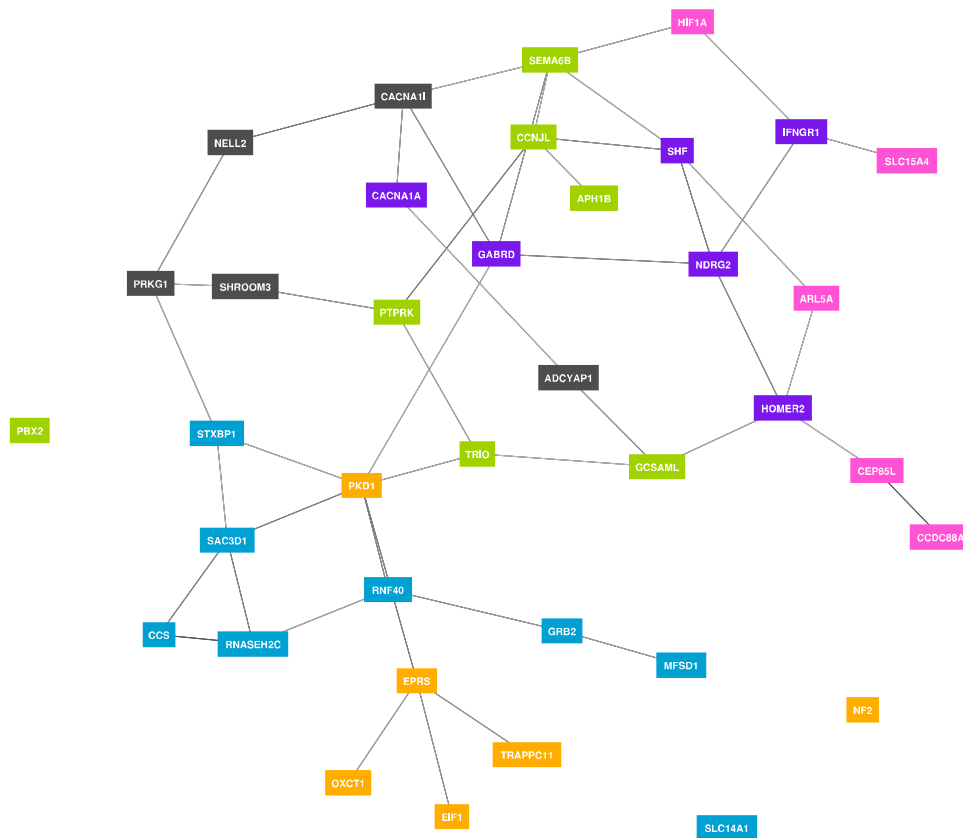

289  
 290 **Figure 1. Gene clustering of differentially expressed genes for the cerebellar cortex based**  
 291 **on gene co-expression.** Public RNA sequencing data (N=31,499) was used to determine co-

292 expression profiles. Gene cluster 1 identified in blue. Gene cluster 2 identified in green. Gene  
293 cluster 3 identified in purple. Gene cluster 4 identified in orange. Gene cluster 5 identified in  
294 pink. Gene cluster 6 identified in black.

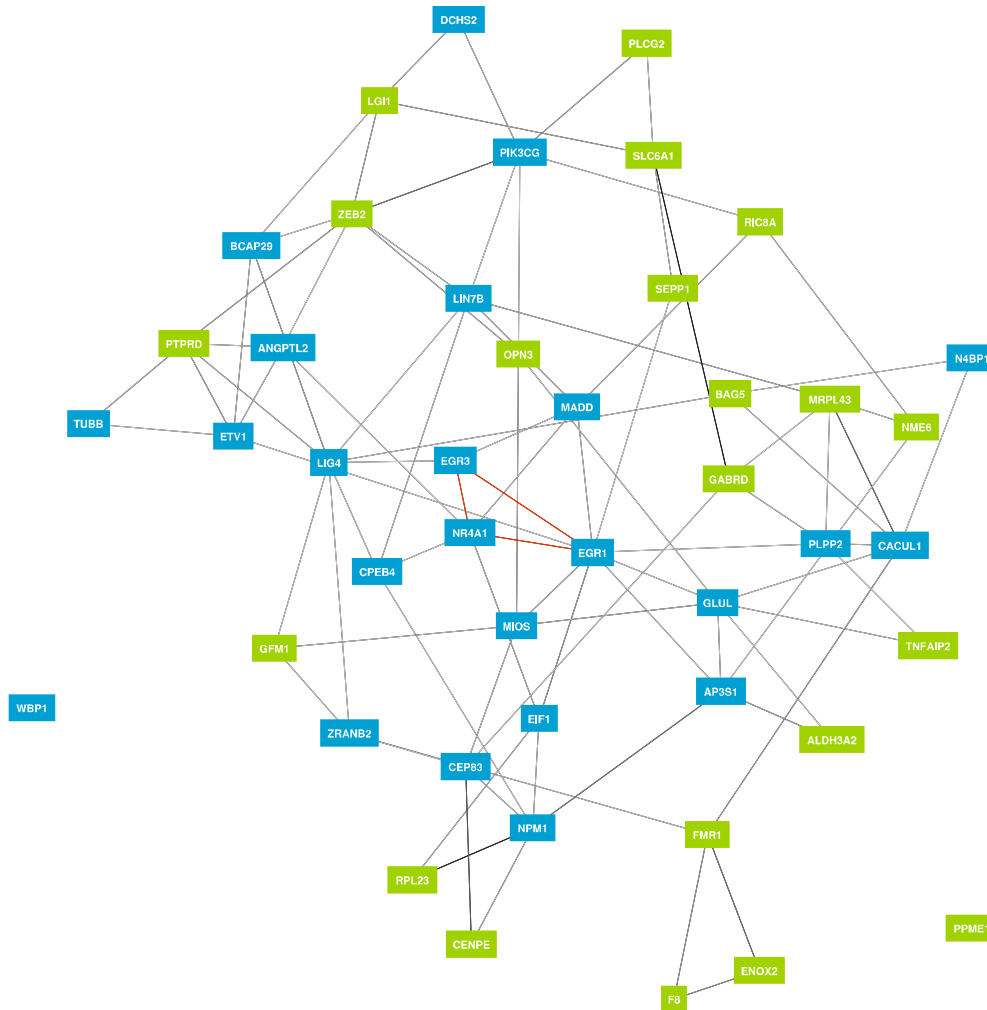

295

296 **Figure 3. Gene clustering of differentially expressed genes for the dentate nucleus based on**  
297 **gene co-expression.** Public RNA sequencing data (N=31,499) was used to determine co-  
298 expression profiles. Gene cluster 1 identified in blue. Gene cluster 2 identified in green.

299

300 **A**

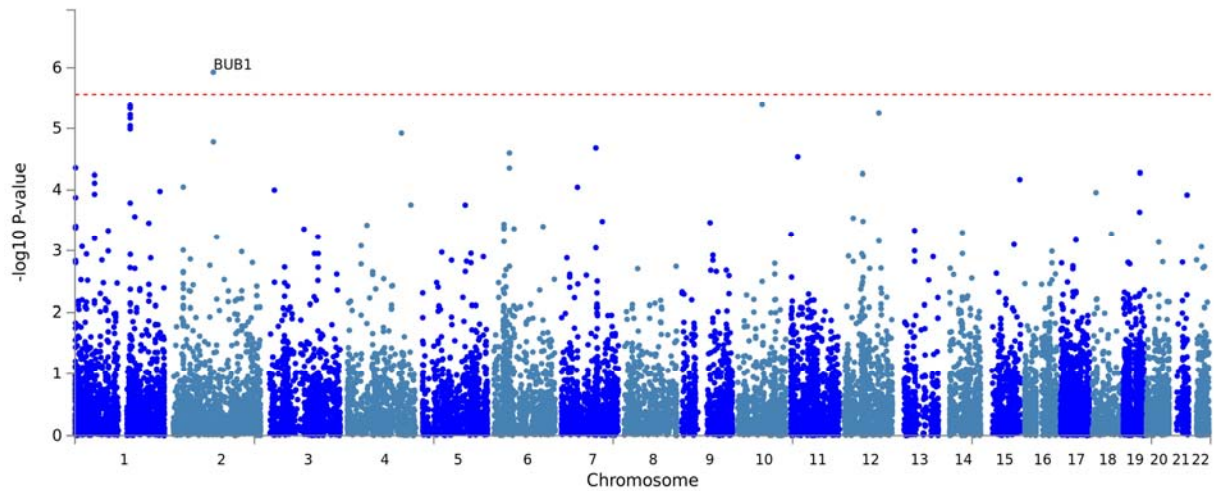

302 **B**

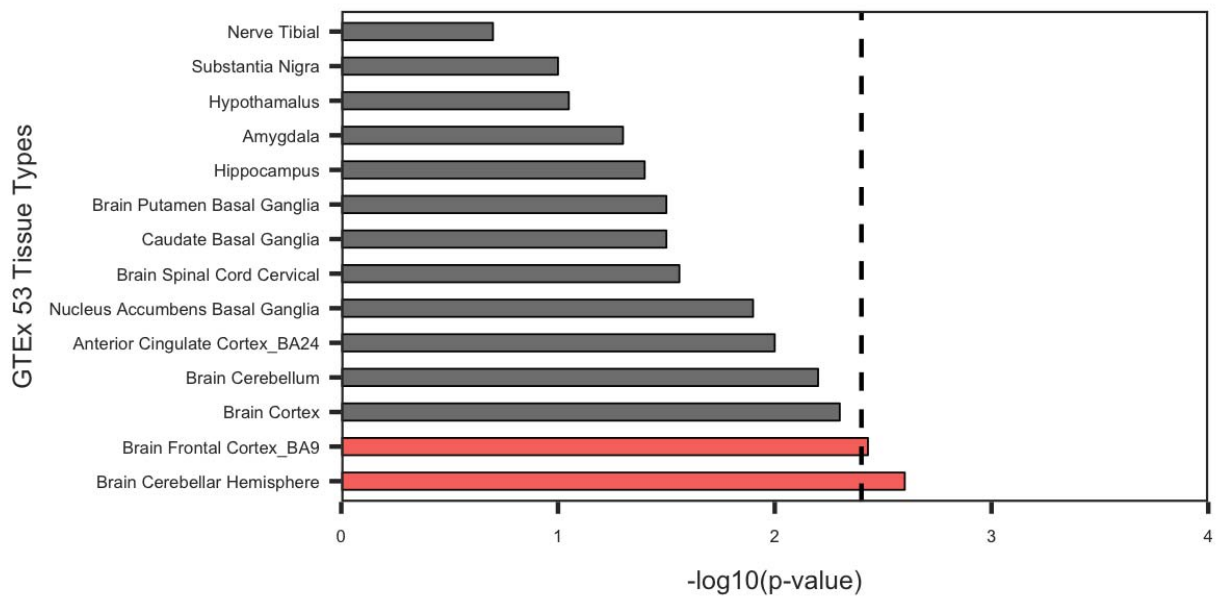

**Figure 3. Genome-wide gene Manhattan plot and brain-relevant tissue enrichment profile.**

305 (A) Manhattan plot of gene-level associations (N=7,154). Bonferroni significance threshold at  
306  $2.744\text{E-}06$  shown with the red dashed line in the plot. (B) Gene-level enrichment analysis of  
307 GWGAS genes in brain-relevant tissue of GTEx53. Bonferroni-corrected significance set at  
308  $0.0036$ , indicated by the dashed line.

309

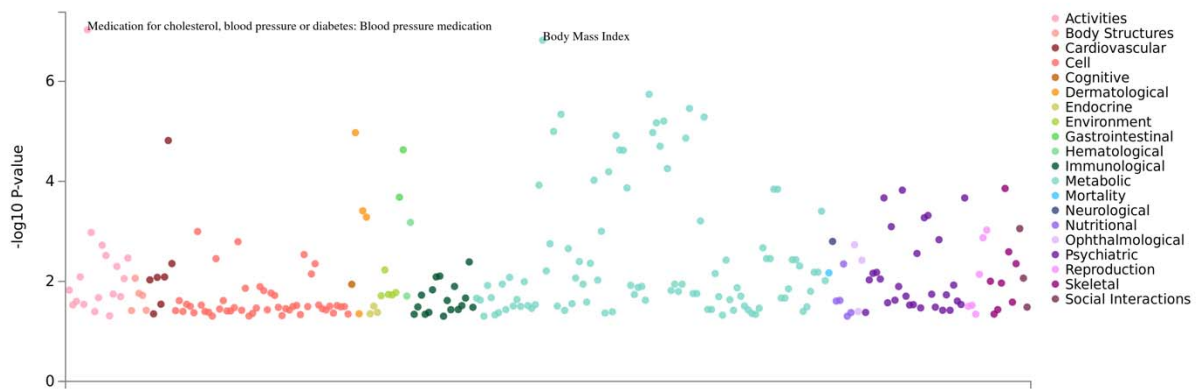

311

312 **Figure 4. PheWAS manhattan plot of *SHF* for different domains.** Colours indicate respective  
313 domains. Only p-values less than 0.05 were plotted.

314

## 314 References

315

1. Elble, R. J. What is Essential Tremor? *Curr. Neurol. Neurosci. Rep.* **13**, 353 (2013).

316

2. Tanner, C. M. *et al.* Essential tremor in twins: an assessment of genetic vs environmental  
317 determinants of etiology. *Neurology* **57**, 1389–91 (2001).

318

3. Clark, L. N. & Louis, E. D. Challenges in essential tremor genetics. *Rev. Neurol. (Paris)*.  
319 **171**, 466–74 (2015).

320

4. Liao, C. *et al.* Investigating the association and causal relationship between restless legs  
321 syndrome and essential tremor. *Parkinsonism Relat. Disord.* (2018).  
322 doi:10.1016/j.parkreldis.2018.10.022

323

5. Müller, S. H. *et al.* Genome-wide association study in essential tremor identifies three new  
324 loci. *Brain* **139**, 3163–3169 (2016).

325

6. Axelrad, J. E. *et al.* Reduced Purkinje cell number in essential tremor: a postmortem  
326 study. *Arch. Neurol.* **65**, 101–7 (2008).

327

7. Topaktas, S., Onur, R. & Dalkara, T. Calcium Channel Blockers and Essential Tremor.  
328 *Eur. Neurol.* **27**, 114–119 (1987).

329

8. Jodice, C. *et al.* Episodic ataxia type 2 (EA2) and spinocerebellar ataxia type 6 (SCA6)  
330 due to CAG repeat expansion in the CACNA1A gene on chromosome 19p. *Hum. Mol.*  
331 *Genet.* **6**, 1973–8 (1997).

332

9. Milewicz, D. M. *et al.* Altered Smooth Muscle Cell Force Generation as a Driver of  
333 Thoracic Aortic Aneurysms and Dissections. *Arterioscler. Thromb. Vasc. Biol.* **37**, 26–34  
334 (2017).

335

10. Kono, S., Terada, T., Ouchi, Y. & Miyajima, H. An altered GABA-A receptor function in  
336 spinocerebellar ataxia type 6 and familial hemiplegic migraine type 1 associated with the  
337 CACNA1A gene mutation. *BBA Clin.* **2**, 56–61 (2014).

338

11. Gironell, A. The GABA Hypothesis in Essential Tremor: Lights and Shadows. *Tremor*

- 339 *Other Hyperkinet. Mov. (N. Y)*. **4**, 254 (2014).
- 340 12. Feil, R. *et al.* Impairment of LTD and cerebellar learning by Purkinje cell-specific  
341 ablation of cGMP-dependent protein kinase I. *J. Cell Biol.* **163**, 295–302 (2003).
- 342 13. Polimanti, R. *et al.* A genome-wide gene-by-trauma interaction study of alcohol misuse in  
343 two independent cohorts identifies PRKG1 as a risk locus. *Mol. Psychiatry* **23**, 154–160  
344 (2018).
- 345 14. Hor, H. *et al.* Missense mutations in TENM4, a regulator of axon guidance and central  
346 myelination, cause essential tremor. *Hum. Mol. Genet.* **24**, 5677–5686 (2015).
- 347 15. Liao, C. *et al.* Transcriptomic changes resulting from STK32B overexpression identifies  
348 pathways potentially relevant to essential tremor. *bioRxiv* 552901 (2019).  
349 doi:10.1101/552901
- 350 16. Muruzheva, Z. M. *et al.* The heterogeneity of drug response as the basis of identification  
351 of essential tremor subtypes. *Rev. Clin. Pharmacol. Drug Ther.* **16**, 54–59 (2018).
- 352 17. Rajput, A. H. & Rajput, A. Saskatchewan movement disorders program. *Can. J. Neurol.*  
353 *Sci.* **42**, 74–87 (2015).
- 354 18. Rajput, A. H. *et al.* Conjugal parkinsonism – Clinical, pathology and genetic study. No  
355 evidence of person-to-person transmission. *Parkinsonism Relat. Disord.* **31**, 87–90 (2016).
- 356 19. Patro, R., Duggal, G., Love, M. I., Irizarry, R. A. & Kingsford, C. Salmon provides fast  
357 and bias-aware quantification of transcript expression. *Nat. Methods* **14**, 417–419 (2017).
- 358 20. Pimentel, H., Bray, N. L., Puente, S., Melsted, P. & Pachter, L. Differential analysis of  
359 RNA-seq incorporating quantification uncertainty. *Nat. Methods* **14**, 687–690 (2017).
- 360 21. Trincado, J. L. *et al.* SUPPA2: fast, accurate, and uncertainty-aware differential splicing  
361 analysis across multiple conditions. *Genome Biol.* **19**, 40 (2018).
- 362 22. Shen, S. *et al.* rMATS: robust and flexible detection of differential alternative splicing  
363 from replicate RNA-Seq data. *Proc. Natl. Acad. Sci. U. S. A.* **111**, E5593–601 (2014).
- 364 23. Watanabe, K., Taskesen, E., van Bochoven, A. & Posthuma, D. Functional mapping and  
365 annotation of genetic associations with FUMA. *Nat. Commun.* **8**, 1826 (2017).
- 366 24. Loh, P.-R. *et al.* Efficient Bayesian mixed-model analysis increases association power in  
367 large cohorts. *Nat. Genet.* **47**, 284–290 (2015).
- 368 25. Deelen, P. *et al.* Improving the diagnostic yield of exome-sequencing, by predicting gene-  
369 phenotype associations using large-scale gene expression analysis. *bioRxiv* 375766  
370 (2018). doi:10.1101/375766
- 371 26. Watanabe, K. *et al.* A global view of pleiotropy and genetic architecture in complex traits.  
372 *bioRxiv* 500090 (2018). doi:10.1101/500090
